# Supplementary material
Source: PubMed Central journal article supplement (PMC7678307)
Supplement: 13071_2020_4472_MOESM1_ESM.pdf [file 13071_2020_4472_MOESM1_ESM.pdf]

## چکیده

آلودگی‌های انگلی می‌توانند باعث ایجاد بسیاری از بیماری‌های تنفسی، گوارشی یا سایر بیماری‌ها شوند و در برخی تغییرات عملکردی در تکسمی‌ها نقش دارند. با این حال، آگاهی درباره تنوع انگل‌های آن‌ها نیز هنوز محدود است. بررسی حاضر کلیه‌ی اطلاعات مربوط به بیماری‌های انگلی اسب‌ها، الاغ‌ها، قاطرها و الاغ‌های وحشی در ایران را که از سال ۱۹۳۱ تا ژوئیه ۲۰۲۰ به عنوان مقالات ژورنالی در مجلات ایرانی و بین‌المللی، پایان‌نامه‌ها و مقالات کنفرانسی منتشر شده است را شامل می‌شود. انگل‌هایی که تاکنون از تکسمی‌های ایران توصیف شده است شامل ۹ جنس از تک‌یاخته‌ها (تریپانوزوما، ژیا ردیا، ایمریا، کلوسیلا، کریپتوسپوریدیوم، توکسوپلاسما، نئوسپورا، تیلریا و بابزیا)، ۵۰ گونه‌ی کرم از دستگاه گوارش (یعنی، ۲ گونه از ترماتودها، ۳ گونه از سستودها و ۳۷ گونه از نماتودها)، و از سایر اندام‌ها (یعنی، شپستوزوما تورکستانیکا، اکینووکوکوس گرانولوزوس، دیکتیوکالوس آرنفیلدی، پارافیلاریا مولتی‌پاپیلوزا، ستاریا اکوئینا و سه گونه اونکوسرکا) می‌باشند. به علاوه، ۱۶ گونه از کنه‌های سخت، ۳ گونه جرب عامل گری، ۲ گونه شپش، ۴ چهار گونه گاستروفیلوس و هیپوبوسکا اکوئینا از تکسمی‌های ایران گزارش شده است. یافته‌های باستان‌انگل‌شناسی در کوپروولایت‌های تکسمی‌ها شامل فاسیولا هیپاتیکا، اوکسیوریس اکوئی، گونه‌ای از آنوپلوسفالا و استرونگل‌ها می‌باشند. بیماری‌های انگلی از نظر رفاه حیوانات، اقتصاد و بهداشت عمومی موضوعات مهمی هستند؛ با این حال، به انگل‌ها و بیماری‌های انگلی تکسمی‌ها در مقایسه با نشخوارکنندگان و شترها در ایران به اندازه کافی توجه نشده است. مرور حاضر بر شکاف دانش در مورد وجود، گونه‌ها، ژنوتیپ‌ها و زیرگروه‌های نئوسپورا هوقسیای، گونه‌های سارکوسیستیس، گونه‌های تریشینلا، گونه‌های کریپتوسپوریدیوم، ژیا ردیا دوئودنالیس، بلاستوسیستیس و میکروسپوریدیا در تکسمی‌ها تاکید می‌کند. شناسایی کنه‌های ناقل انگل‌ها، باکتری‌ها و ویروس‌های بیماری‌زا نیز به طور اندک مورد توجه قرار گرفته است. کارایی کرم‌کش‌های معمول نیز می‌بایستی به طور سیستماتیک مورد ارزیابی قرار گیرد.
